# Supplementary material for: Prognostic factors for conditional survival in patients with muscle-invasive urothelial carcinoma of the bladder treated with radical cystectomy
Source: PubMed Central journal article supplement (PMC4515743; doi:10.1038/srep12171), 2015-07-27

**Prognostic factors for conditional survival in patients with muscle-invasive urothelial carcinoma of the bladder treated with radical cystectomy**

Minyong Kang<sup>1</sup>, Hyung Suk Kim<sup>2</sup>, Chang Wook Jeong<sup>2</sup>, Choel Kwak<sup>2</sup>, Hyeon Hoe Kim<sup>2</sup> and

Ja Hyeon Ku<sup>2,\*</sup>

<sup>1</sup>*Department of Urology, Seoul National University Bundang Hospital, Seongnam, Gyeonggi-*

*do;* <sup>2</sup>*Department of Urology, Seoul National University Hospital, Seoul, Republic of Korea*

**Table S1.** Conditional overall survival for additional periods by time since radical cystectomy

| Years survived after RC (no. at risk) | Conditional overall survival (95% CI) of given year |                   |                   |                   |                   |
|---------------------------------------|-----------------------------------------------------|-------------------|-------------------|-------------------|-------------------|
|                                       | 1 yr                                                | 2 yr              | 3 yr              | 4 yr              | 5 yr              |
| 0 yr (473)                            | 90.8% (89.3-93.3)                                   | 80.7% (77.0-84.4) | 75.0% (70.9-79.1) | 69.8% (65.3-74.3) | 66.1% (61.2-71.0) |
| 1 yr (419)                            | 88.8% (85.7-91.9)                                   | 82.6% (78.9-86.3) | 76.8% (72.3-81.3) | 72.8% (67.9-77.7) | 69.9% (64.8-75.0) |
| 2 yr (339)                            | 92.9% (90.0-95.8)                                   | 86.5% (82.2-90.8) | 81.9% (77.2-86.6) | 78.6% (73.5-83.7) | 76.2% (70.7-81.7) |
| 3 yr (260)                            | 93.1% (90.0-96.2)                                   | 88.1% (83.8-92.4) | 84.6% (79.7-89.8) | 82.0% (76.7-87.3) | 80.3% (74.7-85.9) |
| 4 yr (201)                            | 94.7% (91.7-97.8)                                   | 90.9% (86.6-95.2) | 88.1% (83.2-93.0) | 86.3% (80.8-91.8) | 82.5% (75.8-89.2) |
| 5 yr (162)                            | 96.0% (92.9-99.1)                                   | 93.1% (90.0-97.2) | 91.1% (86.2-96.0) | 87.2% (80.7-93.7) | 85.2% (77.8-92.6) |

RC: radical cystectomy

**Table S2.** Conditional cancer-specific survival for additional periods by time since radical cystectomy

| Years survived after RC (no. at risk) | Conditional cancer-specific survival (95% CI) of given year |                   |                   |                   |                   |
|---------------------------------------|-------------------------------------------------------------|-------------------|-------------------|-------------------|-------------------|
|                                       | 1 yr                                                        | 2 yr              | 3 yr              | 4 yr              | 5 yr              |
| 0 yr (473)                            | 94.7% (93.0-97.2)                                           | 84.3% (81.2-88.0) | 79.5% (75.9-83.7) | 75.0% (70.9-79.6) | 72.5% (68.2-77.4) |
| 1 yr (419)                            | 89.1 (86.4-92.6)                                            | 83.9 (80.6-87.9)  | 79.2 (75.3-83.8)  | 76.6 (72.4-81.6)  | 74.1 (69.5-79.3)  |
| 2 yr (339)                            | 94.3 (92.2-97.5)                                            | 88.9 (85.8-93.2)  | 86.0 (82.3-90.8)  | 83.2 (79.0-88.6)  | 81.2 (76.7-86.9)  |
| 3 yr (260)                            | 94.3 (92.0-97.9)                                            | 91.3 (88.3-95.8)  | 88.9 (85.3-93.7)  | 86.2 (82.0-91.9)  | 86.2 (82.0-91.9)  |
| 4 yr (201)                            | 96.8 (93.0-98.6)                                            | 93.5 (88.6-96.3)  | 91.4 (85.8-94.8)  | 91.4 (85.8-94.8)  | 88.8 (81.8-93.2)  |
| 5 yr (162)                            | 96.6 (92.1-98.5)                                            | 94.5 (89.2-97.2)  | 94.5 (89.2-97.2)  | 91.7 (84.6-95.5)  | 91.7 (84.6-95.5)  |

RC: radical cystectomy

**Table S3.** Univariable analysis for comparison of five-year conditional overall survival rates according to clinicopathological characteristics

| Variables              | Years survived after RC |             |             |            |            |             |
|------------------------|-------------------------|-------------|-------------|------------|------------|-------------|
|                        | Baseline                | 1 yr        | 2 yr        | 3 yr       | 4 yr       | 5 yr        |
| Cohort, no.            | 473                     | 419         | 339         | 260        | 201        | 162         |
| <b>Age</b>             |                         |             |             |            |            |             |
| <65                    | 74.1 ± 0.3              | 75.8 ± 3.1  | 79.8 ± 3.3  | 83.3 ± 3.3 | 88.1 ± 3.3 | 91.0 ± 3.1  |
| ≥65                    | 55.6 ± 0.4              | 60.5 ± 4.7  | 69.7 ± 5.2  | 73.9 ± 5.9 | 66.1 ± 9.8 | 72.8 ± 10.4 |
| <i>P</i> value         | <0.001                  | <0.001      | 0.009       | 0.021      | 0.002      | 0.012       |
| <b>Gender</b>          |                         |             |             |            |            |             |
| Male                   | 65.0 ± 2.7              | 68.8 ± 2.9  | 75.0 ± 3.1  | 78.8 ± 3.5 | 80.7 ± 3.9 | 86.1 ± 3.8  |
| Female                 | 73.4 ± 0.6              | 77.6 ± 6.8  | 84.3 ± 6.5  | 89.2 ± 5.9 | 92.1 ± 5.3 | 92.1 ± 5.3  |
| <i>P</i> value         | 0.535                   | 0.182       | 0.268       | 0.295      | 0.481      | 0.970       |
| <b>Year of surgery</b> |                         |             |             |            |            |             |
| 1991-2001              | 72.3 ± 6.5              | 76.2 ± 6.6  | 88.9 ± 5.2  | 91.4 ± 4.7 | 91.1 ± 4.9 | 91.1 ± 4.9  |
| 2002-2012              | 65.9 ± 2.8              | 70.7 ± 3.0  | 74.6 ± 3.3  | 79.0 ± 3.5 | 79.2 ± 5.3 | 85.2 ± 5.4  |
| <i>P</i> value         | 0.328                   | 0.171       | 0.021       | 0.036      | 0.064      | 0.261       |
| <b>pT stage</b>        |                         |             |             |            |            |             |
| ≤pT2                   | 77.8 ± 2.8              | 80.6 ± 2.8  | 79.7 ± 3.1  | 83.0 ± 3.2 | 85.6 ± 3.7 | 90.2 ± 3.4  |
| ≥pT3                   | 45.4 ± 4.1              | 48.4 ± 4.9  | 67.3 ± 5.8  | 76.4 ± 5.8 | 74.3 ± 7.8 | 78.8 ± 7.8  |
| <i>P</i> value         | <0.001                  | <0.001      | 0.030       | 0.215      | 0.210      | 0.147       |
| <b>Tumor grade</b>     |                         |             |             |            |            |             |
| Low                    | 84.7 ± 4.6              | 86.6 ± 4.8  | 81.7 ± 6.1  | 77.6 ± 7.0 | 78.3 ± 8.4 | 80.1 ± 8.3  |
| High                   | 62.6 ± 2.8              | 66.6 ± 3.0  | 75.4 ± 3.2  | 81.4 ± 3.2 | 83.7 ± 3.7 | 89.2 ± 3.4  |
| <i>P</i> value         | 0.016                   | 0.051       | 0.787       | 0.223      | 0.194      | 0.030       |
| <b>LVI</b>             |                         |             |             |            |            |             |
| Negative               | 76.5 ± 2.7              | 79.9 ± 2.8  | 80.5 ± 3.1  | 81.7 ± 3.4 | 84.6 ± 3.9 | 87.1 ± 3.8  |
| Positive               | 46.0 ± 4.4              | 49.3 ± 5.0  | 65.4 ± 5.8  | 76.3 ± 5.8 | 76.8 ± 7.0 | 87.0 ± 6.6  |
| <i>P</i> value         | <0.001                  | <0.001      | 0.007       | 0.223      | 0.113      | 0.733       |
| <b>CIS</b>             |                         |             |             |            |            |             |
| Negative               | 63.5 ± 2.9              | 68.0 ± 3.1  | 76.7 ± 3.2  | 81.4 ± 3.3 | 82.5 ± 3.9 | 86.7 ± 3.8  |
| Positive               | 72.3 ± 4.9              | 74.4 ± 5.3  | 73.9 ± 6.4  | 77.1 ± 6.4 | 83.5 ± 6.3 | 89.8 ± 5.6  |
| <i>P</i> value         | 0.033                   | 0.125       | 0.676       | 0.777      | 0.866      | 0.889       |
| <b>Margin status</b>   |                         |             |             |            |            |             |
| Negative               | 66.6 ± 2.5              | 70.2 ± 2.7  | 76.3 ± 2.9  | 80.8 ± 2.9 | 83.0 ± 3.4 | 87.8 ± 3.2  |
| Positive               | 16.9 ± 15.0             | 22.2 ± 19.2 | 33.3 ± 27.2 | -          | -          | -           |
| <i>P</i> value         | <0.001                  | 0.001       | 0.003       | -          | -          | -           |

|                   |            |            |            |            |             |             |
|-------------------|------------|------------|------------|------------|-------------|-------------|
| LN status         |            |            |            |            |             |             |
| Negative          | 73.9 ± 2.6 | 76.2 ± 2.8 | 79.0 ± 2.9 | 81.6 ± 3.1 | 83.9 ± 3.4  | 88.1 ± 3.2  |
| Positive          | 37.6 ± 5.5 | 43.1 ± 6.6 | 60.6 ± 8.3 | 72.0 ± 8.8 | 67.7 ± 16.5 | 74.7 ± 17.5 |
| <i>P</i> value    | <0.001     | <0.001     | <0.001     | 0.030      | 0.239       | 0.408       |
| No. of LN removed |            |            |            |            |             |             |
| ≥20               | 79.4 ± 4.8 | 84.7 ± 4.8 | 92.6 ± 4.4 | 93.9 ± 4.3 | 96.2 ± 3.8  | 100.0 ± 0.0 |
| ≤19               | 62.7 ± 2.8 | 66.7 ± 3.0 | 73.2 ± 3.2 | 78.2 ± 3.3 | 80.5 ± 3.9  | 85.2 ± 3.7  |
| <i>P</i> value    | 0.004      | 0.010      | 0.010      | 0.087      | 0.223       | 0.251       |
| NACH              |            |            |            |            |             |             |
| Not done          | 65.5 ± 2.6 | 69.5 ± 2.8 | 76.6 ± 3.0 | 80.4 ± 3.1 | 82.8 ± 3.6  | 87.5 ± 3.4  |
| Done              | 70.6 ± 7.4 | 72.9 ± 8.0 | 73.2 ± 9.1 | 80.5 ± 9.0 | 83.6 ± 8.8  | 88.9 ± 8.1  |
| <i>P</i> value    | 0.510      | 0.552      | 0.902      | 0.610      | 0.889       | 0.901       |
| ACH               |            |            |            |            |             |             |
| Not done          | 64.1 ± 2.9 | 78.1 ± 3.2 | 75.3 ± 3.4 | 79.9 ± 3.5 | 85.3 ± 3.7  | 89.5 ± 3.5  |
| Done              | 71.3 ± 4.5 | 72.6 ± 5.0 | 78.3 ± 0.5 | 81.1 ± 5.4 | 76.1 ± 7.3  | 81.5 ± 7.3  |
| <i>P</i> value    | 0.200      | 0.229      | 0.713      | 0.766      | 0.593       | 0.754       |

<sup>†</sup>Percent survival estimates are shown with standard error calculated by Greenwood method.

LVI: lymphovascular invasion, CIS: carcinoma *in situ*, LN: lymph node, NACH: neoadjuvant chemotherapy, ACH: adjuvant chemotherapy.

**Table S4.** Univariable analysis for comparison of five-year conditional cancer-specific survival rates according to clinicopathological characteristics

| Variables         | Years survived after RC |             |             |            |            |            |
|-------------------|-------------------------|-------------|-------------|------------|------------|------------|
|                   | Baseline                | 1 yr        | 2 yr        | 3 yr       | 4 yr       | 5 yr       |
| Cohort, no.       | 473                     | 419         | 339         | 260        | 201        | 162        |
| Age               |                         |             |             |            |            |            |
| <65               | 78.0 ± 2.9              | 78.2 ± 3.0  | 82.4 ± 3.2  | 86.3 ± 3.1 | 89.4 ± 3.1 | 92.4 ± 2.8 |
| ≥65               | 65.2 ± 3.9              | 67.7 ± 4.4  | 79.6 ± 4.4  | 86.2 ± 4.2 | 84.1 ± 8.7 | 86.9 ± 8.7 |
| <i>P</i> value    | 0.001                   | 0.013       | 0.191       | 0.435      | 0.599      | 0.490      |
| Gender            |                         |             |             |            |            |            |
| Male              | 71.7 ± 2.6              | 73.1 ± 2.7  | 80.1 ± 2.9  | 85.0 ± 2.8 | 87.4 ± 3.3 | 90.8 ± 3.1 |
| Female            | 78.5 ± 5.9              | 80.9 ± 6.2  | 88.0 ± 5.7  | 93.1 ± 4.8 | 96.2 ± 3.8 | 96.2 ± 3.8 |
| <i>P</i> value    | 0.418                   | 0.251       | 0.360       | 0.305      | 0.412      | 0.724      |
| Year of surgery   |                         |             |             |            |            |            |
| 1991-2001         | 74.0 ± 6.5              | 76.2 ± 6.6  | 88.9 ± 5.8  | 91.4 ± 4.7 | 91.1 ± 4.9 | 91.1 ± 4.9 |
| 2002-2012         | 73.5 ± 2.7              | 76.2 ± 2.7  | 81.1 ± 3.0  | 86.0 ± 2.9 | 88.1 ± 4.3 | 92.1 ± 4.1 |
| <i>P</i> value    | 0.925                   | 0.820       | 0.156       | 0.218      | 0.326      | 0.754      |
| pT stage          |                         |             |             |            |            |            |
| ≤pT2              | 82.7 ± 2.6              | 83.6 ± 2.7  | 83.6 ± 2.9  | 87.4 ± 2.8 | 90.9 ± 2.9 | 94.4 ± 2.5 |
| ≥pT3              | 53.6 ± 4.3              | 54.4 ± 5.0  | 75.0 ± 5.5  | 82.8 ± 5.3 | 82.4 ± 7.3 | 84.2 ± 7.3 |
| <i>P</i> value    | <0.001                  | <0.001      | 0.097       | 0.432      | 0.430      | 0.172      |
| Tumor grade       |                         |             |             |            |            |            |
| Low               | 91.6 ± 3.7              | 90.1 ± 4.4  | 88.2 ± 5.1  | 88.2 ± 5.1 | 91.5 ± 4.7 | 93.7 ± 4.3 |
| High              | 69.0 ± 2.7              | 71.0 ± 2.9  | 80.1 ± 3.0  | 86.1 ± 2.8 | 88.0 ± 3.4 | 91.2 ± 3.2 |
| <i>P</i> value    | 0.002                   | 0.009       | 0.327       | 0.772      | 0.399      | 0.227      |
| LVI               |                         |             |             |            |            |            |
| Negative          | 83.1 ± 2.4              | 84.2 ± 2.5  | 85.7 ± 2.8  | 88.8 ± 2.7 | 92.2 ± 2.8 | 93.5 ± 2.7 |
| Positive          | 52.0 ± 4.6              | 53.2 ± 5.1  | 70.0 ± 5.7  | 79.4 ± 5.6 | 79.9 ± 6.9 | 87.0 ± 6.6 |
| <i>P</i> value    | <0.001                  | <0.001      | 0.003       | 0.106      | 0.068      | 0.458      |
| CIS               |                         |             |             |            |            |            |
| Negative          | 69.7 ± 2.8              | 72.3 ± 3.0  | 82.4 ± 2.9  | 87.9 ± 2.6 | 89.8 ± 3.1 | 92.4 ± 3.0 |
| Positive          | 79.3 ± 4.6              | 78.1 ± 5.1  | 76.9 ± 6.2  | 80.3 ± 6.3 | 85.5 ± 6.1 | 89.8 ± 5.6 |
| <i>P</i> value    | 0.028                   | 0.192       | 0.805       | 0.414      | 0.327      | 0.428      |
| Margin status     |                         |             |             |            |            |            |
| Negative          | 73.1 ± 2.4              | 74.5 ± 2.5  | 81.5 ± 2.6  | 85.9 ± 2.5 | 88.5 ± 2.9 | 91.6 ± 2.7 |
| Positive          | 19.0 ± 16.8             | 22.2 ± 19.2 | 33.3 ± 27.2 | -          | -          | -          |
| <i>P</i> value    | 0.001                   | 0.001       | 0.001       |            |            |            |
| LN status         |                         |             |             |            |            |            |
| Negative          | 81.6 ± 2.3              | 80.9 ± 2.6  | 84.3 ± 2.7  | 87.7 ± 2.6 | 88.7 ± 3.0 | 91.0 ± 2.9 |
| Positive          | 39.6 ± 5.7              | 46.2 ± 6.4  | 64.9 ± 7.6  | 77.1 ± 7.7 | 90.7 ± 6.3 | 90.7 ± 6.3 |
| <i>P</i> value    | <0.001                  | <0.001      | <0.001      | 0.027      | 0.825      | 0.765      |
| No. of LN removed |                         |             |             |            |            |            |
| ≥20               | 82.6 ± 4.8              | 71.6 ± 2.9  | 79.0 ± 2.9  | 85.0 ± 2.8 | 87.7 ± 3.2 | 90.5 ± 3.0 |
| ≤19               | 69.7 ± 2.7              | 84.7 ± 4.8  | 92.6 ± 4.4  | 93.9 ± 4.3 | 96.2 ± 3.8 | 96.2 ± 3.8 |
| <i>P</i> value    | 0.017                   | 0.067       | 0.080       | 0.414      | 0.825      | 0.751      |
| NACH              |                         |             |             |            |            |            |
| Not done          | 71.9 ± 2.5              | 73.5 ± 2.7  | 80.8 ± 2.8  | 85.7 ± 2.7 | 88.3 ± 3.0 | 91.7 ± 2.8 |
| Done              | 78.5 ± 7.3              | 79.4 ± 7.2  | 85.9 ± 6.7  | 91.2 ± 6.0 | 94.7 ± 5.1 | 94.7 ± 5.1 |
| <i>P</i> value    | 0.467                   | 0.335       | 0.540       | 0.395      | 0.455      | 0.745      |

| ACH            |            |            |            |            |            |            |
|----------------|------------|------------|------------|------------|------------|------------|
| Not done       | 70.6 ± 0.3 | 71.6 ± 3.1 | 79.7 ± 3.2 | 85.1 ± 3.1 | 89.1 ± 3.3 | 91.9 ± 3.1 |
| Done           | 77.4 ± 4.2 | 80.4 ± 4.3 | 84.7 ± 4.4 | 88.6 ± 4.2 | 88.0 ± 5.5 | 91.2 ± 5.2 |
| <i>P</i> value | 0.179      | 0.102      | 0.356      | 0.507      | 0.861      | 0.816      |

†Percent survival estimates are shown with standard error calculated by Greenwood method.  
LVI: lymphovascular invasion, CIS: carcinoma *in situ*, LN: lymph node, NACH: neoadjuvant chemotherapy, ACH: adjuvant chemotherapy.

**Figure S1.** Comparison of conditional probabilities of (A) overall survival (1 to 5 years) and (B) cancer-specific survival (1 to 5 years) between two groups who had different survivorship (1yr versus 5yr) after radical cystectomy.

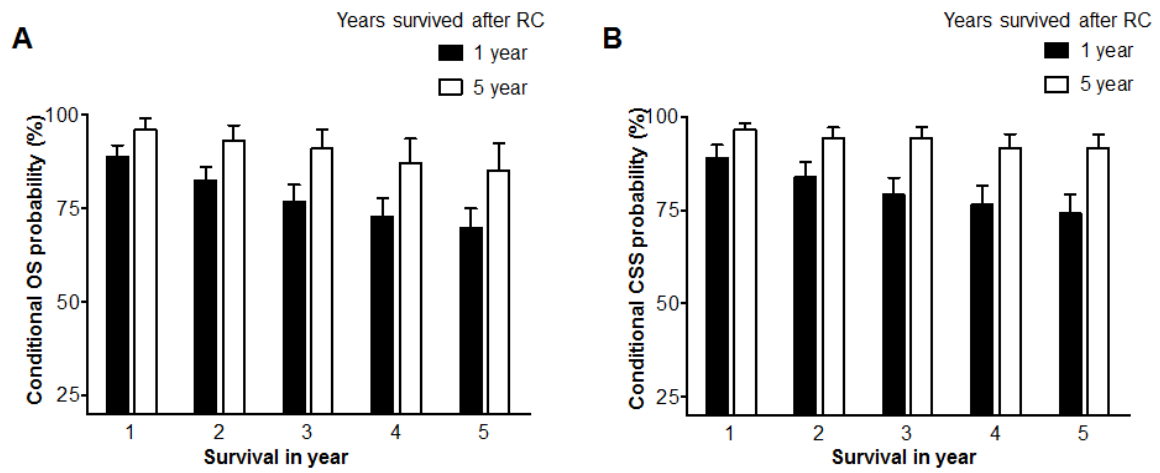

Supplement: srep12171-s1.pdf [file srep12171-s1.pdf]
